# Supplementary material for: Curcumin loaded Ag–TiO2-halloysite nanotubes platform for combined chemo-photodynamic therapy treatment of cancer cells
Source: Royal Society of Chemistry journal article supplement (doi:10.1039/d2ra05777h), 2022-01-01
Supplement: d2ra05777h1.pdf [file d2ra05777h1.pdf]

## Curcumin Loaded Ag-TiO<sub>2</sub>-Halloysite Nanotubes Platform for Combined Chemo-Photodynamic Therapy Treatment of Cancer Cells.

Emmanuel Nyankson<sup>1\*</sup>, Dominic Awuzah<sup>1</sup>, Elvis K. Tiburu<sup>2</sup>, Johnson K. Efavi<sup>1</sup>, Benjamin Agyei-Tuffour<sup>1</sup>, Lily Paemka<sup>3</sup>

<sup>1</sup>Department of Materials Science and Engineering, University of Ghana, LG 77, Legon-Accra

<sup>2</sup>Department of Biomedical Engineering, University of Ghana, LG 77, Legon-Accra

<sup>3</sup>Department Biochemistry, Cell and Molecular Biology, University of Ghana, P. O Box LG54, Legon, Ghana;

\*Corresponding Author: [enyankson@ug.edu.gh](mailto:enyankson@ug.edu.gh)

### Supplementary Materials

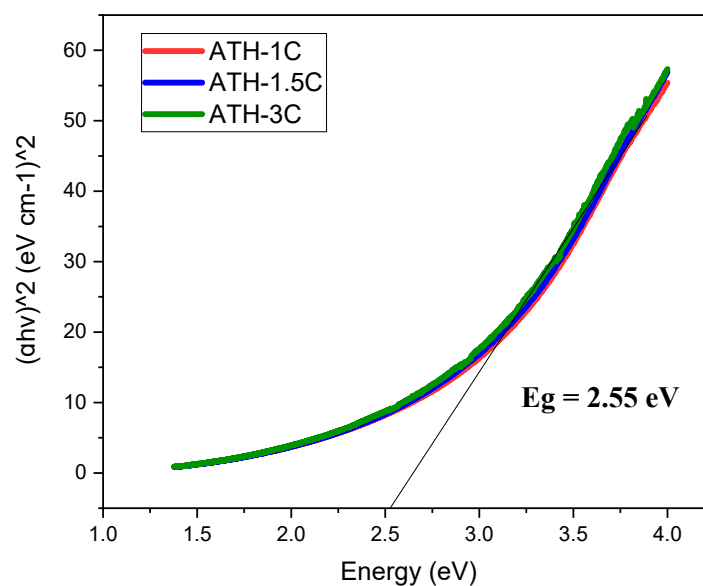

Figure 1S: Tauc plots of ATH-1C: 1wt.% Ag-TiO<sub>2</sub>-90 wt.% HNTs, ATH-1.5C: 1.5wt.% Ag-TiO<sub>2</sub>-90 wt.% HNTs and ATH-3C: 3wt.% Ag-TiO<sub>2</sub>-90 wt.% HNTs

**Table 1S:** Curcumin content measured by TGA

| <b>Composite/curcumin loaded composite</b>   | <b>% Weight loss<br/>(20–100 °C)</b> | <b>% Weight loss<br/>(100–800 °C)</b> | <b>%<br/>Curcumin<br/>loaded</b> |
|----------------------------------------------|--------------------------------------|---------------------------------------|----------------------------------|
| 1 wt.%Ag-TiO <sub>2</sub> -90 wt.%HNT        | 2.4                                  | 13.9                                  | -                                |
| Cur-1 wt.%Ag-TiO <sub>2</sub> -90 wt.% HNT   | 2.8                                  | 16.7                                  | 2.8                              |
| 1.5 wt.%Ag-TiO <sub>2</sub> -90 wt.%HNT      | 2.5                                  | 13.5                                  | -                                |
| Cur-1.5 wt.%Ag-TiO <sub>2</sub> -90 wt.% HNT | 2.6                                  | 16.6                                  | 3.7                              |
| 3 wt.%Ag-TiO <sub>2</sub> -90 wt.%HNT        | 6.9                                  | 12.7                                  | -                                |
| Cur-3 wt.%Ag-TiO <sub>2</sub> -90 wt.% HNT   | 3.6                                  | 16.3                                  | 3.6                              |
| HNT                                          | 4.5                                  | 15.6                                  | -                                |
| HNT loaded curcumin                          | 3.3                                  | 19.5                                  | 3.9                              |

**Table 2S:** Percentage of cumulative drug release

| <b>Time</b> | <b>Samples</b>                               |                                                |                                              |          |
|-------------|----------------------------------------------|------------------------------------------------|----------------------------------------------|----------|
|             | Cur- 90 wt.%HNT-<br>1wt.%Ag-TiO <sub>2</sub> | Cur- 90 wt.%HNT-<br>1.5wt.%Ag-TiO <sub>2</sub> | Cur- 90 wt.%HNT-<br>3wt.%Ag-TiO <sub>2</sub> | Cur- HNT |
| 2           | 8.8434                                       | 6.401                                          | 8.240                                        | 7.353    |
| 4           | 19.020                                       | 17.036                                         | 16.975                                       | 15.582   |
| 6           | 26.882                                       | 24.099                                         | 24.681                                       | 22.692   |
| 8           | 37.465                                       | 33.061                                         | 31.678                                       | 29.958   |
| 10          | 41.377                                       | 39.042                                         | 36.320                                       | 36.760   |
| 24          | 72.167                                       | 69.211                                         | 55.312                                       | 68.144   |
| 48          | 81.715                                       | 80.382                                         | 51.916                                       | 85.907   |

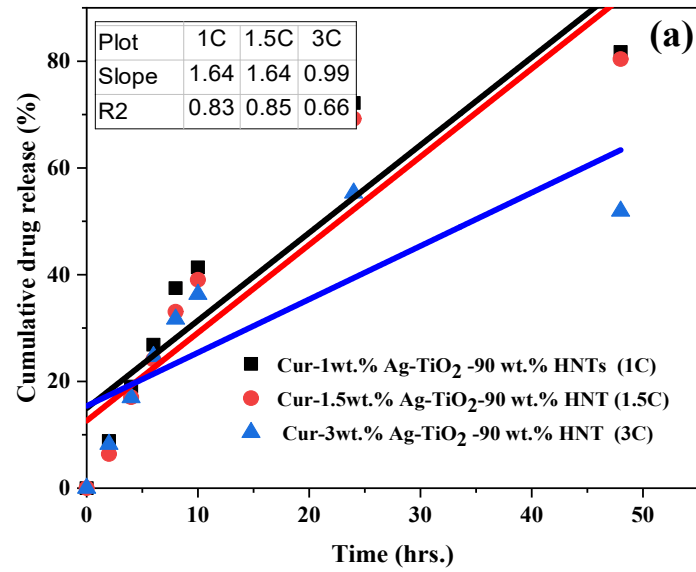

**Figure 2S.** Zero order kinetic model for Curcumin loaded HNT- Ag-TiO<sub>2</sub> samples

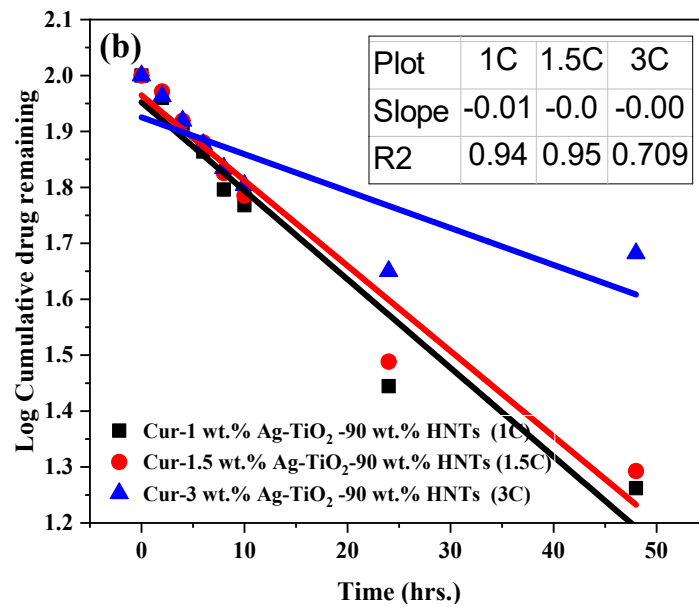

**Figure 3S.** First order kinetic model Curcumin loaded HNT- Ag-TiO<sub>2</sub> samples

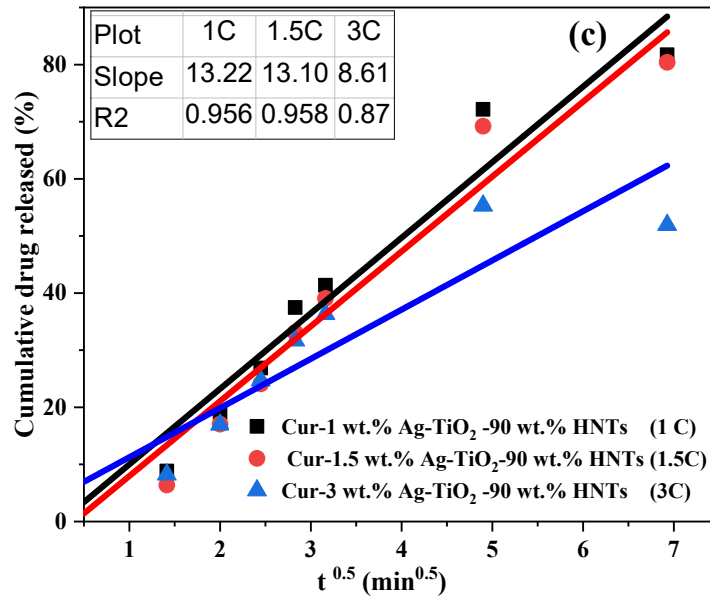

Figure 4S. Higuchi model for (Curcumin loaded HNT- Ag-TiO<sub>2</sub> samples

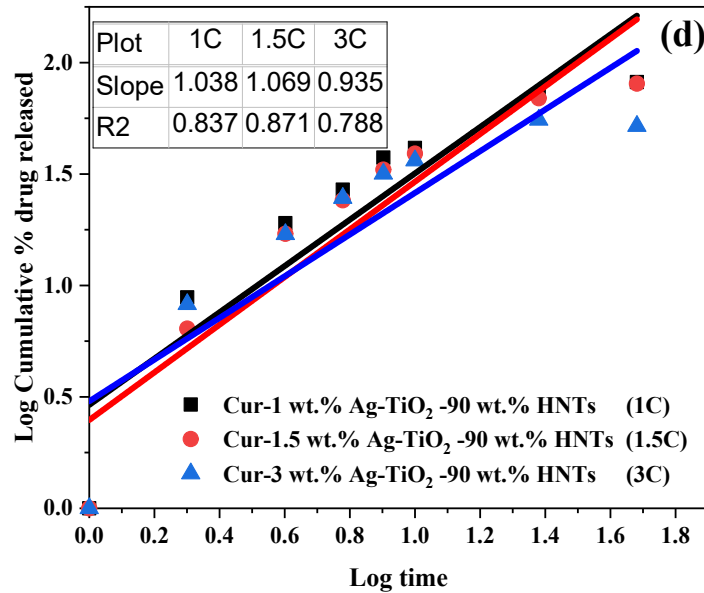

Figure 5S. Korsmeyer-Peppas model for Curcumin loaded HNT- Ag-TiO<sub>2</sub> samples

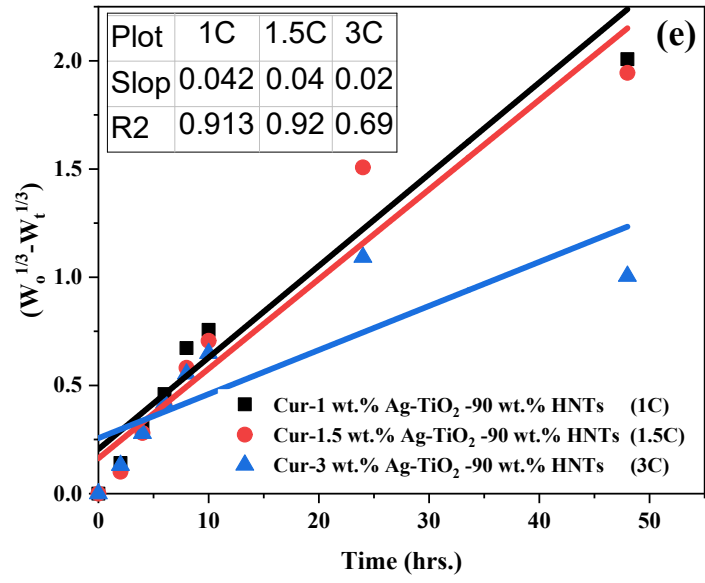

**Figure 6S.** Hixson Crowell model for Curcumin loaded HNT- Ag-TiO<sub>2</sub> samples
